# Supplementary material for: Positive effect of an electrolyzed reduced water on gut permeability, fecal microbiota and liver in an animal model of Parkinson’s disease
Source: PubMed Central journal article supplement (PMC6786615; doi:10.1371/journal.pone.0223238), 2019-10-10
Supplement: pone.0223238.s002.pdf [file pone.0223238.s002.pdf]

| Taxa                                           | CONTROL |       | PERM  |      | PERM+ERW |       | P-value      | C vs PERM | C vs PERM+ERW | PERM vs PERM+ERW |
|------------------------------------------------|---------|-------|-------|------|----------|-------|--------------|-----------|---------------|------------------|
|                                                | mean    | SD    | mean  | SD   | mean     | SD    |              |           |               |                  |
| <b>Phylum</b>                                  |         |       |       |      |          |       |              |           |               |                  |
| Bacteroidetes <sup>b</sup>                     | 57.43   | 11.56 | 58.41 | 7.68 | 43.06    | 12.13 | <b>0.004</b> |           | **            | **               |
| Candidate division TM7 <sup>a</sup>            | 0.11    | 0.29  | 0.08  | 0.10 | 0.16     | 0.07  | <b>0.014</b> |           | *             |                  |
| Cyanobacteria <sup>a</sup>                     | 0.10    | 0.09  | 0.15  | 0.31 | 0.12     | 0.14  | 0.748        |           |               |                  |
| Elusimicrobia <sup>a</sup>                     | 0.10    | 0.14  | 0.06  | 0.06 | 0.04     | 0.05  | 0.625        |           |               |                  |
| Firmicutes <sup>b</sup>                        | 40.89   | 12.22 | 38.34 | 8.03 | 55.33    | 11.85 | <b>0.003</b> |           | **            | **               |
| Proteobacteria <sup>a</sup>                    | 0.38    | 0.18  | 0.43  | 0.18 | 0.60     | 0.24  | <b>0.042</b> |           | *             |                  |
| Tenericutes <sup>a</sup>                       | 0.70    | 1.51  | 0.49  | 0.69 | 0.45     | 0.34  | 0.467        |           |               |                  |
| Verrucomicrobia <sup>a</sup>                   | 0.15    | 0.25  | 1.91  | 5.26 | 0.10     | 0.31  | 0.591        |           |               |                  |
| U.m. of bacteria kingdom <sup>b</sup>          | 0.11    | 0.03  | 0.07  | 0.02 | 0.08     | 0.02  | <b>0.017</b> | *         | *             |                  |
| Others <sup>a</sup>                            | 0.03    | 0.01  | 0.04  | 0.01 | 0.04     | 0.02  | 0.322        |           |               |                  |
| <b>Family</b>                                  |         |       |       |      |          |       |              |           |               |                  |
| Bacteroidaceae <sup>a</sup>                    | 0.21    | 0.24  | 0.34  | 0.42 | 0.16     | 0.08  | 0.761        |           |               |                  |
| Porphyromonadaceae <sup>a</sup>                | 0.10    | 0.09  | 0.46  | 0.87 | 0.10     | 0.08  | 0.051        |           |               |                  |
| Prevotellaceae <sup>b</sup>                    | 9.68    | 4.30  | 8.81  | 4.48 | 6.23     | 3.66  | 0.176        |           |               |                  |
| ratAN060301C <sup>a</sup>                      | 0.44    | 0.62  | 0.16  | 0.16 | 1.80     | 2.20  | <b>0.029</b> |           | *             | **               |
| Rikenellaceae <sup>a</sup>                     | 0.18    | 0.22  | 0.21  | 0.12 | 0.08     | 0.08  | 0.067        |           |               |                  |
| S24-7 <sup>b</sup>                             | 45.47   | 10.32 | 47.66 | 7.55 | 34.05    | 11.23 | <b>0.009</b> |           | *             | *                |
| U.m. of Bacteroidales order <sup>a</sup>       | 1.26    | 0.99  | 0.70  | 0.26 | 0.55     | 0.29  | <b>0.050</b> |           | *             |                  |
| U.m. of Candidate division TM7 <sup>a</sup>    | 0.11    | 0.29  | 0.08  | 0.10 | 0.16     | 0.07  | <b>0.014</b> |           | *             |                  |
| U.m. of Gastranaerophilales order <sup>a</sup> | 0.10    | 0.09  | 0.15  | 0.31 | 0.12     | 0.14  | 0.748        |           |               |                  |
| Elusimicrobiaceae <sup>a</sup>                 | 0.10    | 0.14  | 0.06  | 0.06 | 0.04     | 0.05  | 0.625        |           |               |                  |
| Lactobacillaceae <sup>a</sup>                  | 5.93    | 5.95  | 6.02  | 4.63 | 4.51     | 3.79  | 0.776        |           |               |                  |
| Christensenellaceae <sup>a</sup>               | 0.07    | 0.06  | 0.16  | 0.19 | 0.03     | 0.01  | <b>0.005</b> |           |               | **               |
| Clostridiaceae 1 <sup>a</sup>                  | 0.05    | 0.04  | 0.05  | 0.04 | 0.17     | 0.10  | <b>0.005</b> |           | *             | **               |
| Defluviitaleaceae <sup>a</sup>                 | 0.07    | 0.02  | 0.14  | 0.08 | 0.13     | 0.08  | <b>0.036</b> | *         |               |                  |
| Family XIII clostridiales order <sup>b</sup>   | 0.11    | 0.06  | 0.14  | 0.07 | 0.15     | 0.02  | 0.141        |           |               |                  |
| Lachnospiraceae <sup>b</sup>                   | 20.88   | 9.87  | 17.92 | 6.65 | 31.23    | 10.09 | <b>0.006</b> |           | *             | **               |
| Peptococcaceae <sup>b</sup>                    | 0.12    | 0.08  | 0.10  | 0.06 | 0.15     | 0.05  | 0.297        |           |               |                  |
| Peptostreptococcaceae <sup>a</sup>             | 0.21    | 0.15  | 0.22  | 0.21 | 0.29     | 0.34  | 0.866        |           |               |                  |
| Ruminococcaceae <sup>a</sup>                   | 12.97   | 3.97  | 13.10 | 3.58 | 17.99    | 4.19  | <b>0.011</b> |           | *             |                  |
| vadinBB60 <sup>a</sup>                         | 0.14    | 0.06  | 0.17  | 0.15 | 0.23     | 0.11  | 0.117        |           |               |                  |
| U.m. of clostridiales order <sup>b</sup>       | 0.21    | 0.09  | 0.21  | 0.08 | 0.34     | 0.09  | <b>0.002</b> |           | **            | **               |
| Erysipelotrichaceae <sup>a</sup>               | 0.05    | 0.07  | 0.05  | 0.05 | 0.07     | 0.05  | 0.159        |           |               |                  |
| Rhodospirillaceae <sup>a</sup>                 | 0.03    | 0.05  | 0.06  | 0.10 | 0.04     | 0.06  | 0.971        |           |               |                  |
| Alcaligenaceae <sup>a</sup>                    | 0.07    | 0.06  | 0.08  | 0.07 | 0.07     | 0.08  | 0.827        |           |               |                  |
| Desulfovibrionaceae <sup>a</sup>               | 0.18    | 0.08  | 0.19  | 0.08 | 0.33     | 0.15  | <b>0.014</b> |           | *             | *                |
| Helicobacteraceae <sup>a</sup>                 | 0.05    | 0.04  | 0.05  | 0.04 | 0.13     | 0.15  | 0.162        |           |               |                  |

|                                                    |       |      |       |      |       |      |              |    |    |
|----------------------------------------------------|-------|------|-------|------|-------|------|--------------|----|----|
| Enterobacteriaceae <sup>a</sup>                    | 0.01  | 0.01 | 0.02  | 0.01 | 0.01  | 0.01 | 0.061        |    |    |
| Pasteurellaceae <sup>a</sup>                       | 0.01  | 0.02 | 0.03  | 0.04 | 0.02  | 0.02 | 0.254        |    |    |
| Anaeroplasmataceae <sup>a</sup>                    | 0.04  | 0.10 | 0.03  | 0.05 | 0.03  | 0.04 | 0.623        |    |    |
| U. m. of RF9 order <sup>a</sup>                    | 0.65  | 1.53 | 0.44  | 0.65 | 0.40  | 0.34 | 0.376        |    |    |
| Paenibacillaceae <sup>a</sup>                      | 0.00  | 0.00 | 0.00  | 0.00 | 0.01  | 0.01 | 0.166        |    |    |
| Verrucomicrobiaceae <sup>a</sup>                   | 0.15  | 0.25 | 1.91  | 5.26 | 0.10  | 0.31 | 0.591        |    |    |
| U. m. of Bacteria kingdom <sup>b</sup>             | 0.11  | 0.03 | 0.07  | 0.02 | 0.08  | 0.02 | <b>0.017</b> | *  | *  |
| Others <sup>b</sup>                                | 0.23  | 0.14 | 0.20  | 0.05 | 0.19  | 0.05 | 0.946        |    |    |
| <b>Genus</b>                                       |       |      |       |      |       |      |              |    |    |
| Bacteroides <sup>a</sup>                           | 0.21  | 0.24 | 0.34  | 0.42 | 0.16  | 0.08 | 0.761        |    |    |
| Barnesiella <sup>a</sup>                           | 0.04  | 0.01 | 0.13  | 0.08 | 0.04  | 0.01 | 0.317        |    |    |
| Parabacteroides <sup>a</sup>                       | 0.04  | 0.02 | 0.30  | 0.20 | 0.05  | 0.02 | 0.150        |    |    |
| U.m. of porphyromonadaceae family <sup>a</sup>     | 0.43  | 0.15 | 0.11  | 0.03 | 0.13  | 0.03 | 0.217        |    |    |
| Alloprevotella <sup>a</sup>                        | 0.57  | 0.18 | 0.67  | 0.22 | 0.16  | 0.08 | 0.065        |    |    |
| Prevotella <sup>a</sup>                            | 6.22  | 1.31 | 3.57  | 0.75 | 3.92  | 0.89 | 0.199        |    |    |
| U. m. of Prevotellaceae family <sup>a</sup>        | 2.88  | 0.68 | 4.57  | 1.48 | 2.15  | 0.52 | 0.671        |    |    |
| U.m. of rat AN 060301C family <sup>a</sup>         | 0.44  | 0.20 | 0.16  | 0.05 | 1.80  | 0.70 | <b>0.002</b> | *  | ** |
| Alistipes <sup>a</sup>                             | 0.17  | 0.07 | 0.17  | 0.03 | 0.07  | 0.02 | 0.091        |    |    |
| S24-7 <sup>b</sup>                                 | 0.20  | 0.04 | 0.20  | 0.03 | 0.10  | 0.02 | <b>0.035</b> |    | *  |
| U. m. of S24-7 family <sup>b</sup>                 | 44.84 | 3.23 | 47.35 | 2.38 | 33.82 | 3.53 | <b>0.010</b> | *  | *  |
| U.m. of Bacteroidales order <sup>a</sup>           | 1.26  | 0.31 | 0.70  | 0.08 | 0.55  | 0.09 | <b>0.050</b> | *  |    |
| Candidatus Saccharimonas <sup>a</sup>              | 0.11  | 0.09 | 0.08  | 0.03 | 0.16  | 0.02 | <b>0.014</b> | *  |    |
| U.m. of Gastranaerophilales order <sup>a</sup>     | 0.10  | 0.03 | 0.15  | 0.10 | 0.12  | 0.04 | 0.748        |    |    |
| Elusimicrobium <sup>a</sup>                        | 0.10  | 0.04 | 0.06  | 0.02 | 0.04  | 0.01 | 0.625        |    |    |
| Lactobacillus <sup>a</sup>                         | 5.93  | 1.88 | 6.02  | 1.46 | 4.51  | 1.20 | 0.776        |    |    |
| U. m. of Christensenellaceae family <sup>a</sup>   | 0.06  | 0.02 | 0.14  | 0.06 | 0.03  | 0.00 | <b>0.041</b> |    | *  |
| Clostridium sensu stricto 1 <sup>a</sup>           | 0.03  | 0.01 | 0.02  | 0.01 | 0.12  | 0.03 | <b>0.003</b> | *  | ** |
| U. m. of Defluviitaleaceae family <sup>a</sup>     | 0.07  | 0.01 | 0.14  | 0.03 | 0.13  | 0.02 | <b>0.036</b> | *  |    |
| U.m.of familyXIII Clostridiales order <sup>b</sup> | 0.09  | 0.01 | 0.13  | 0.02 | 0.12  | 0.01 | 0.171        |    |    |
| Acetatifactor <sup>a</sup>                         | 0.07  | 0.02 | 0.04  | 0.03 | 0.07  | 0.02 | 0.053        |    |    |
| Anaerostipes <sup>a</sup>                          | 0.14  | 0.06 | 0.16  | 0.06 | 0.45  | 0.22 | 0.196        |    |    |
| Blautia <sup>b</sup>                               | 5.78  | 0.99 | 5.07  | 0.87 | 10.71 | 1.50 | <b>0.003</b> | ** | ** |
| Butyrivibrio <sup>a</sup>                          | 0.01  | 0.00 | 0.00  | 0.00 | 0.02  | 0.02 | 0.349        |    |    |
| Dorea <sup>a</sup>                                 | 0.05  | 0.01 | 0.13  | 0.03 | 0.07  | 0.02 | 0.055        |    |    |
| U.m. of Lachnospiraceae family <sup>b</sup>        | 13.29 | 2.00 | 11.85 | 1.39 | 18.37 | 1.73 | <b>0.031</b> | *  | *  |
| Lachnospira <sup>a</sup>                           | 1.05  | 0.41 | 0.02  | 0.01 | 0.47  | 0.24 | <b>0.024</b> | *  |    |
| Marvinbryantia <sup>a</sup>                        | 0.03  | 0.02 | 0.14  | 0.12 | 0.13  | 0.10 | 0.419        |    |    |

|                                                  |      |      |      |      |       |      |              |     |    |
|--------------------------------------------------|------|------|------|------|-------|------|--------------|-----|----|
| Oribacterium <sup>a</sup>                        | 0.13 | 0.01 | 0.21 | 0.08 | 0.30  | 0.05 | 0.051        |     |    |
| Roseburia <sup>a</sup>                           | 0.05 | 0.01 | 0.03 | 0.01 | 0.10  | 0.03 | <b>0.012</b> |     | ** |
| Shuttleworthia <sup>a</sup>                      | 0.23 | 0.05 | 0.17 | 0.03 | 0.44  | 0.09 | <b>0.014</b> |     | *  |
| Stomatobaculum <sup>a</sup>                      | 0.03 | 0.01 | 0.05 | 0.02 | 0.06  | 0.02 | 0.486        |     |    |
| U. m. of Peptococcaceae family <sup>b</sup>      | 0.11 | 0.03 | 0.09 | 0.02 | 0.14  | 0.01 | 0.300        |     |    |
| U.m.of Peptostreptococcaceae family <sup>a</sup> | 0.21 | 0.05 | 0.22 | 0.07 | 0.29  | 0.11 | 0.866        |     |    |
| Anaerotruncus <sup>a</sup>                       | 0.16 | 0.03 | 0.18 | 0.04 | 0.29  | 0.04 | <b>0.038</b> | *** | ** |
| Flavonifractor <sup>a</sup>                      | 0.00 | 0.00 | 0.00 | 0.00 | 0.02  | 0.01 | <b>0.002</b> | *   |    |
| U.m. of Ruminococcaceae family <sup>b</sup>      | 7.80 | 0.55 | 9.20 | 1.03 | 10.86 | 0.73 | <b>0.037</b> | *   | *  |
| Intestinimonas <sup>a</sup>                      | 1.81 | 0.17 | 1.81 | 0.19 | 3.20  | 0.38 | <b>0.004</b> |     | *  |
| Oscillibacter <sup>a</sup>                       | 0.69 | 0.10 | 0.52 | 0.15 | 1.66  | 0.58 | <b>0.005</b> |     | ** |
| Papillibacter <sup>a</sup>                       | 0.07 | 0.01 | 0.07 | 0.02 | 0.18  | 0.03 | <b>0.005</b> | *   | ** |
| Ruminococcus <sup>a</sup>                        | 2.37 | 0.90 | 1.26 | 0.48 | 1.70  | 0.41 | 0.283        |     |    |
| U. m. of vadin BB60 family <sup>a</sup>          | 0.14 | 0.02 | 0.17 | 0.05 | 0.23  | 0.04 | 0.117        |     |    |
| U. m. of Clostridiales order <sup>b</sup>        | 0.21 | 0.03 | 0.21 | 0.03 | 0.34  | 0.03 | <b>0.002</b> | **  | ** |
| U.m. of Erysipelotrichaceae family <sup>a</sup>  | 0.03 | 0.02 | 0.02 | 0.00 | 0.03  | 0.00 | 0.101        |     |    |
| Turcibacter <sup>a</sup>                         | 0.00 | 0.00 | 0.02 | 0.01 | 0.02  | 0.01 | 0.944        |     |    |
| Thalassospira <sup>a</sup>                       | 0.03 | 0.01 | 0.06 | 0.03 | 0.04  | 0.02 | 0.928        |     |    |
| Parasutterella <sup>a</sup>                      | 0.07 | 0.02 | 0.08 | 0.02 | 0.07  | 0.03 | 0.827        |     |    |
| Desulfovibrio <sup>a</sup>                       | 0.18 | 0.03 | 0.19 | 0.02 | 0.33  | 0.05 | <b>0.014</b> | *   | *  |
| Helicobacter <sup>a</sup>                        | 0.05 | 0.01 | 0.05 | 0.01 | 0.13  | 0.05 | 0.162        |     |    |
| Escherichia-Shigella <sup>a</sup>                | 0.01 | 0.00 | 0.02 | 0.00 | 0.01  | 0.00 | 0.106        |     |    |
| Anaeroplasma <sup>a</sup>                        | 0.04 | 0.03 | 0.03 | 0.01 | 0.03  | 0.01 | 0.623        |     |    |
| U. m. of RF9 order <sup>a</sup>                  | 0.64 | 0.48 | 0.39 | 0.19 | 0.32  | 0.10 | 0.722        |     |    |
| U. m. of RF9 order order <sup>a</sup>            | 0.01 | 0.00 | 0.05 | 0.02 | 0.09  | 0.03 | <b>0.007</b> | **  |    |
| U. m. of Paenibacillaceae family <sup>a</sup>    | 0.00 | 0.00 | 0.00 | 0.00 | 0.01  | 0.00 | 0.166        |     |    |
| Akkermansia <sup>a</sup>                         | 0.15 | 0.08 | 1.91 | 1.66 | 0.10  | 0.10 | 0.591        |     |    |
| U. m. of Bacteria kingdom <sup>b</sup>           | 0.11 | 0.01 | 0.07 | 0.01 | 0.08  | 0.01 | <b>0.017</b> | *   | *  |
| Others <sup>a</sup>                              | 0.44 | 0.05 | 0.48 | 0.03 | 0.48  | 0.04 | 0.204        |     |    |
